# Supplementary material for: Field-induced single molecule magnet behavior of a dinuclear cobalt(ii) complex: a combined experimental and theoretical study
Source: Royal Society of Chemistry journal article supplement (doi:10.1039/d0dt02158j), 2020-01-01
Supplement: d0dt02158j1.pdf [file d0dt02158j1.pdf]

## Electronic Supplementary Information

---

### Field-Induced Single Molecule Magnet Behavior In a Dinuclear Cobalt(II) Complex: A Combined Experimental And Theoretical Study

Abhisek Banerjee, Snehasis Banerjee, Carlos J. Gómez García, Samia Benmansour, Shouvik Chattopadhyay\*

#### Hirshfeld Surface Analysis

Hirshfeld surfaces<sup>1-2</sup> and the associated two-dimensional (2D) fingerprint<sup>3-5</sup> plots were calculated using Crystal Explorer,<sup>6</sup> with bond lengths to hydrogen atoms set to standard values.<sup>7</sup> For each point on the Hirshfeldisurface, two distances,  $d_e$  (the distance from the point to the nearest nucleus external to the surface) and  $d_i$  (the distance to the nearest nucleus internal to the surface), are defined. The normalized contact distance ( $d_{norm}$ ) based on  $d_e$  and  $d_i$  is given by:

$$d_{norm} = \frac{(d_i - r_i^{vdw})}{r_i^{vdw}} + \frac{(d_e - r_e^{vdw})}{r_e^{vdw}}$$

where  $r_i^{vdw}$  and  $r_e^{vdw}$  are the van der Waals radii of the atoms. The value of  $d_{norm}$  is negative or positive depending if intermolecular contacts are shorter or longer than the van der Waals separations. The parameter  $d_{norm}$  displays a surface with a red–white–blue color scheme, where bright red spots highlight shorter contacts, white areas represent contacts around the van der Waals separation, and blue regions are devoid of close contacts. For a given crystal structure and

set of spherical atomic electron densities, the Hirshfeld surface is unique<sup>8</sup> and thus it suggests the possibility of gaining additional insight into the intermolecular interaction of molecular crystals.

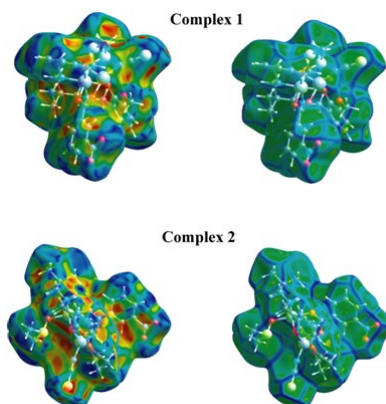

**Figure S1.** Hirshfeld surfaces mapped over shape index (left) and curvedness (right).

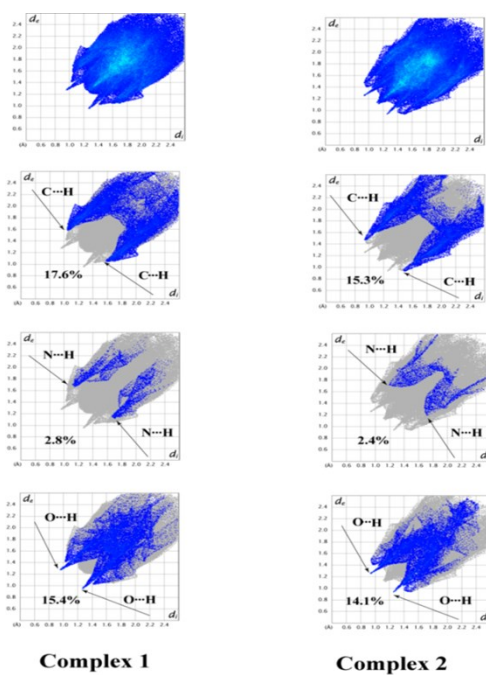

**Figure S2.** Fingerprint plot: Full (top), resolved into H...C/C...H (second from the top), H...N/N...H (second from the bottom) and H...O/O...H (bottom) contacts contributed to the total Hirshfeld Surface area of complexes **1** and **2**.

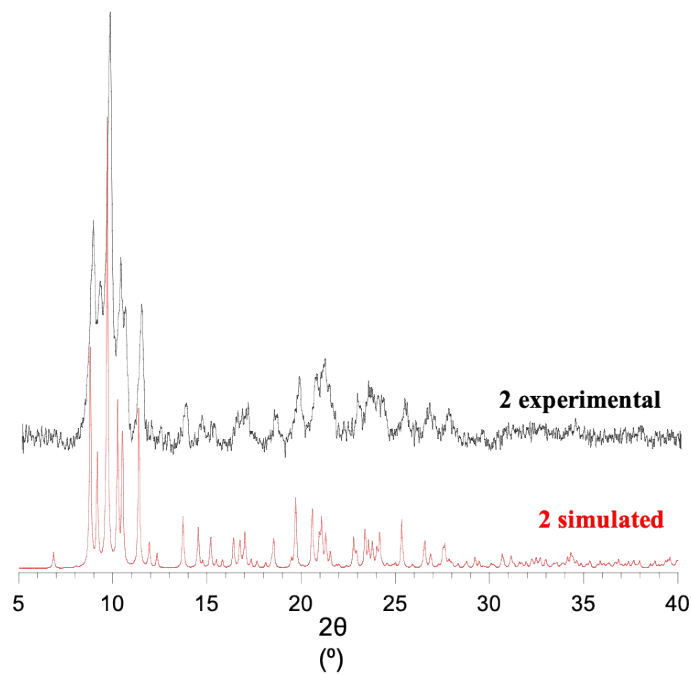

**Figure S3.** Experimental and simulated powder XRD patterns of complex 2 confirming the purity of bulk material.

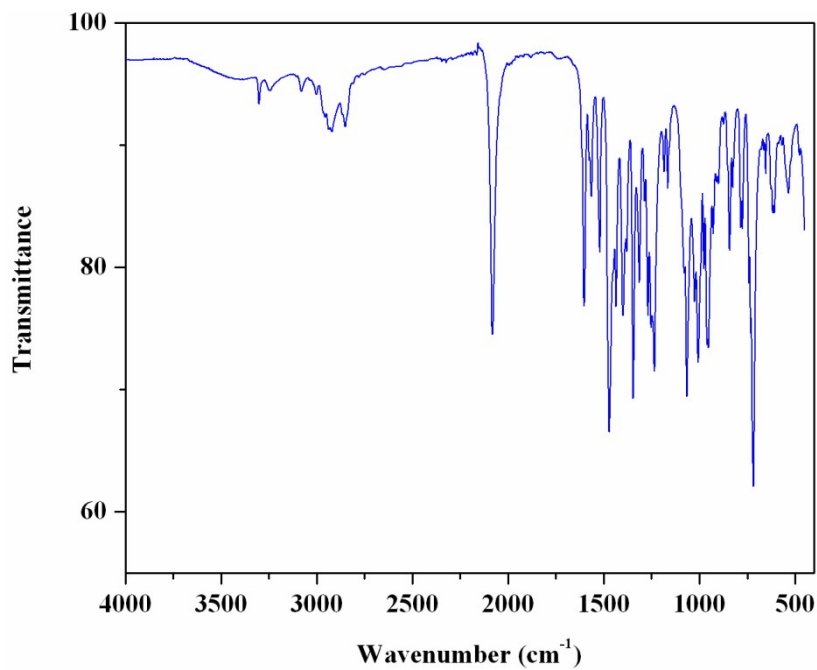

**Figure S4.** IR spectrum of complex 1.

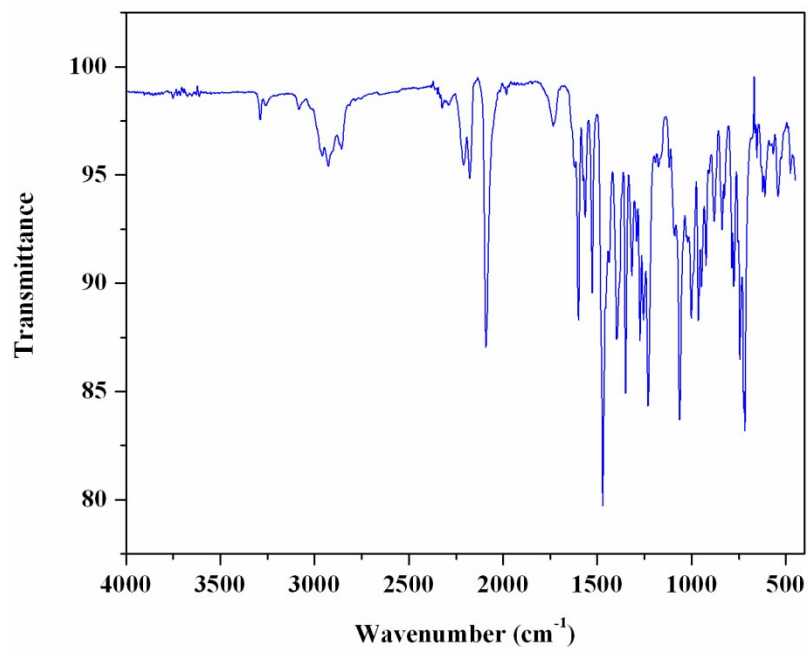

**Figure S5.** IR spectrum of complex 2.

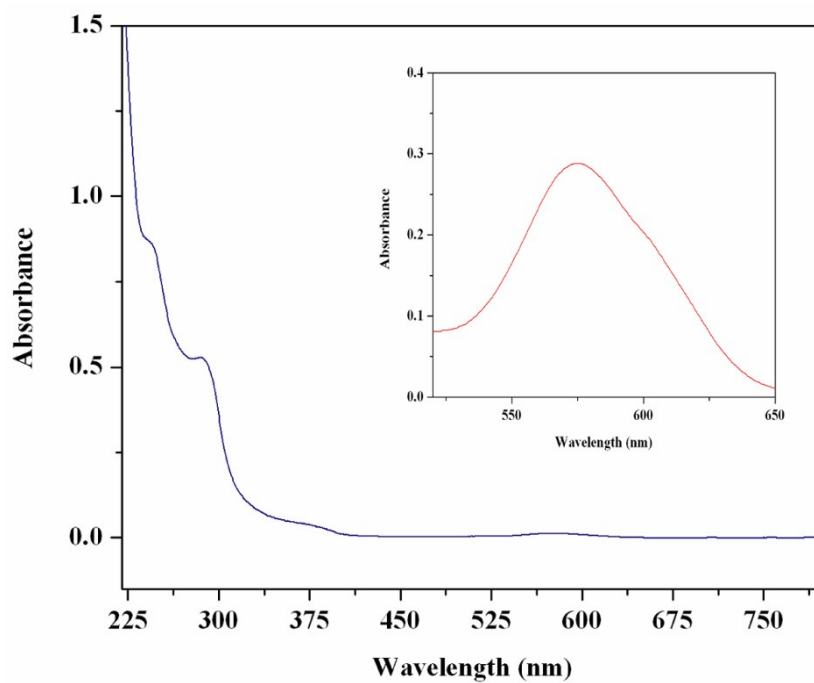

**Figure S6.** Electronic spectrum of complex 1. Inset shows a zoom of the 520-650 nm range.

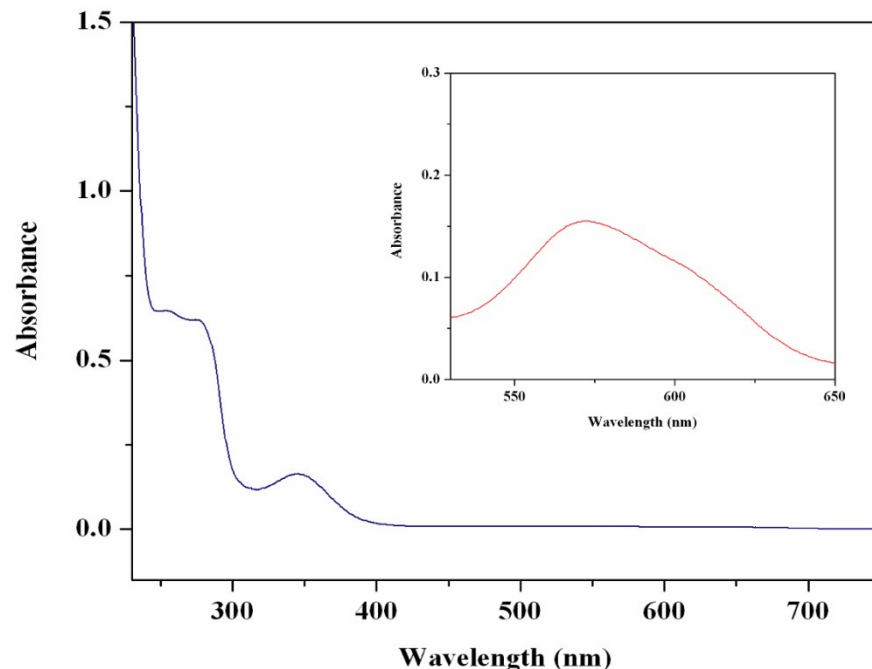

**Figure S7.** Electronic spectrum of complex **2**. Inset shows a zoom of the 520-650 nm.

**Table S1.** Selected bond angles ( $^{\circ}$ ) in complexes **1** and **2**.

| Atoms     | 1          | 2         | Atoms     | 1          | 2         |
|-----------|------------|-----------|-----------|------------|-----------|
| O1-Co1-O2 | 80.39(9)   | 80.92(3)  | O1-Co2-O2 | 83.30(9)   | 84.39(3)  |
| O1-Co1-O5 | 90.27(8)   | 93.88(4)  | O1-Co2-O3 | 71.88(8)   | 73.20(2)  |
| O1-Co1-O9 | 92.90(8)   | 87.10(2)  | O1-Co2-O4 | 156.05(10) | 153.40(2) |
| O1-Co1-N1 | 91.83(11)  | 172.80(2) | O1-Co2-O6 | 96.73(9)   | 97.90(2)  |
| O1-Co1-N2 | 172.23(9)  | 92.4(2)   | O1-Co2-N3 | 111.62(15) | 113.40(3) |
| O2-Co1-O5 | 92.58(9)   | 87.38(3)  | O2-Co2-O3 | 154.38(9)  | 156.10(2) |
| O2-Co1-O9 | 92.11(9)   | 90.20(2)  | O2-Co2-O4 | 73.10(10)  | 70.10(2)  |
| O2-Co1-N1 | 171.87(11) | 91.90(2)  | O2-Co2-O6 | 99.26(9)   | 94.50(2)  |
| O2-Co1-N2 | 91.93(9)   | 173.10(2) | O2-Co2-N3 | 116.08(14) | 108.70(3) |
| O5-Co1-O9 | 174.72(9)  | 177.20(2) | O3-Co2-O4 | 130.81(10) | 130.60(3) |
| O5-Co1-N1 | 85.07(10)  | 86.53(4)  | O3-Co2-O6 | 77.98(9)   | 81.00(2)  |
| O5-Co1-N2 | 88.92(9)   | 91.50(4)  | O3-Co2-N3 | 80.05(14)  | 88.00(3)  |
| O9-Co1-N1 | 90.60(10)  | 92.10(2)  | O4-Co2-O6 | 83.20(10)  | 77.70(2)  |
| O9-Co1-N2 | 88.50(9)   | 91.00(2)  | O4-Co2-N3 | 83.30(15)  | 82.60(3)  |
| N1-Co1-N2 | 95.80(11)  | 94.80(2)  | O6-Co2-N3 | 136.22(15) | 142.20(3) |

*SHAPE analysis of the coordination geometry around Co1 and Co2 in both complexes*

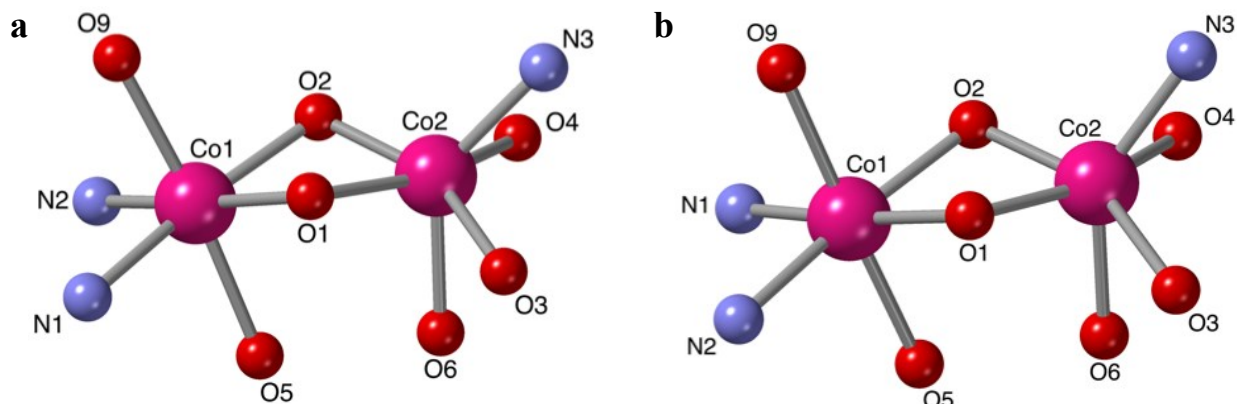

**Figure S8.** Coordination geometry of both Co atoms in complexes **1** (a) and **2** (b)

**Table S2.** SHAPE<sup>9</sup> values for the five possible coordination geometries for coordination number six<sup>10</sup> in both Co centres in [(dmsO)Co<sup>II</sup>L<sup>1</sup>( $\mu$ -(*m*-NO<sub>2</sub>)C<sub>6</sub>H<sub>4</sub>COO)Co<sup>II</sup>(NCS)] (**1**) and [(dmsO)Co<sup>II</sup>L<sup>2</sup>( $\mu$ -(*m*-NO<sub>2</sub>)C<sub>6</sub>H<sub>4</sub>COO)Co<sup>II</sup>(NCS)] (**2**).

| Compound |          | <b>1</b>     |              | <b>2</b>     |              |
|----------|----------|--------------|--------------|--------------|--------------|
| Geometry | symmetry | Co1          | Co2          | Co1          | Co2          |
| HP-6     | D6h      | 31.981       | 29.700       | 31.191       | 30.120       |
| PPY-6    | C5v      | 26.975       | 10.730       | 27.142       | 12.980       |
| OC-6     | Oh       | <b>0.404</b> | 9.725        | <b>0.275</b> | 9.117        |
| TPR-6    | D3h      | 13.946       | <b>7.097</b> | 14.744       | <b>7.839</b> |
| JPPY-6   | C5v      | 30.909       | 13.401       | 31.048       | 15.308       |

HP-6 = Hexagon, PPY-6 = Pentagonal pyramid, OC-6 = Octahedron, TPR-6 = Trigonal prism, JPPY-6 = Johnson pentagonal pyramid J2. Minima values are indicated in bold.

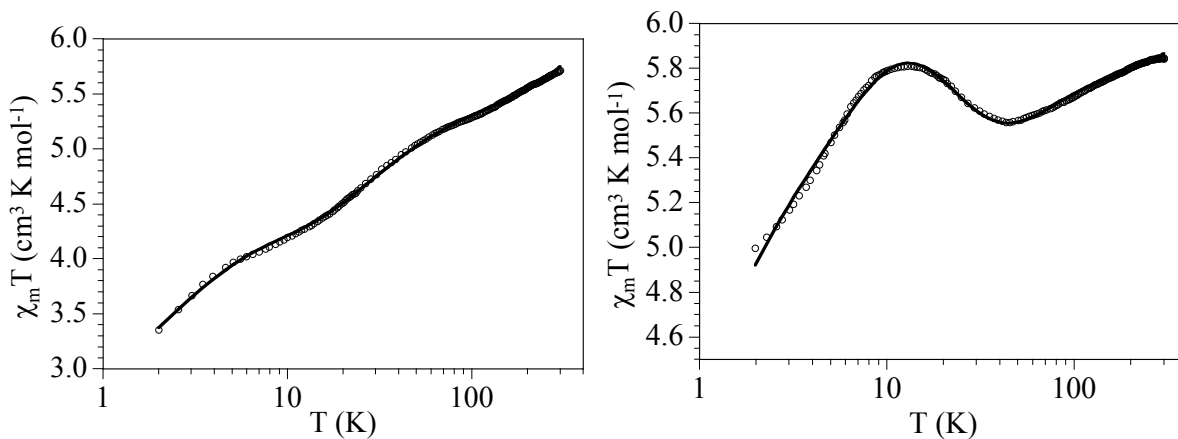

**Figure S9.** Thermal variation (logarithmic scale) of the  $\chi_m T$  product for complexes **1** (left) and **2** (right).

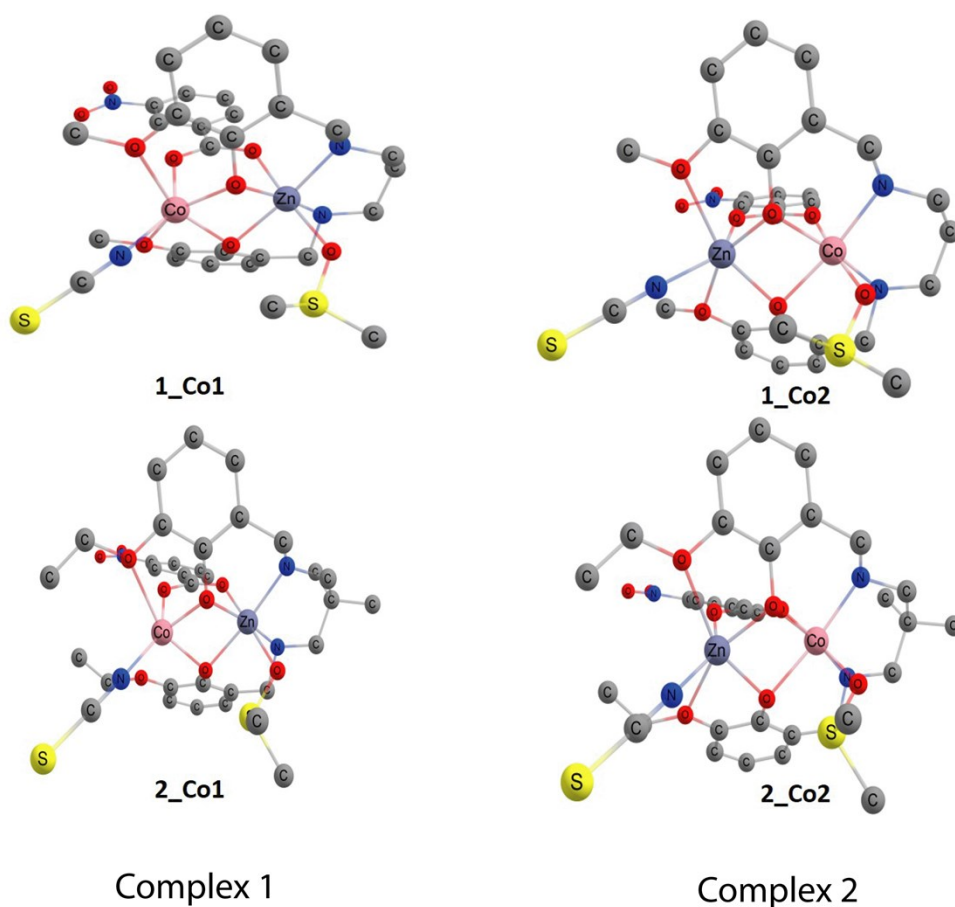

**Figure S10.** Pictorial view of diamagnetic substitution method applied to calculate the ZFS of two cobalt centers in complexes **1** and **2**.

## References

- (1) M. A. Spackman and D. Jayatilaka, *CrystEngComm*, 2009, **11**, 19-32.
- (2) F. L. Hirshfeld, *Theor. Chim. Acta*, 1977, **44**, 129-138.
- (3) A. L. Rohl, M. Moret, W. Kaminsky, K. Claborn, J. J. McKinnon and B.Kahr, *Cryst. Growth Des.*, 2008, **8**, 4517-4525.
- (4) A. Parkin, G. Barr, W. Dong, C. J. Gilmore, D. Jayatilaka, J. J. McKinnon, M. A. Spackman and C. C. Wilson, *CrystEngComm*, 2007, **9**, 648-652.
- (5) M. A. Spackman and J. J. McKinnon, *CrystEngComm*, 2002, **4**, 378-392.
- (6) S. K. Wolff, D. J. Grimwood, J. J. McKinnon, D. Jayatilaka and M. A. Spackman, *Crystal Explorer 2.0*; University of Western Australia: Perth, Australia, **2007**.  
<http://hirshfeldsurfacenet.blogspot.com/>.
- (7) F. H. Allen, O. Kennard, D. G. Watson, L. Brammer, A. G. Orpen and R. Taylor, *J. Chem. Soc. Perkin Trans 2.*, 1987, S1-S19.
- (8) J. J. Kinnon, M. A. Spackman and A. S. Mitchell, *Acta Cryst.*, 2004, **B60**, 627-668.
- (9) M. Llunell, D. Casanova, J. Cirera, J. M. Bofill, P. Alemany, S. Alvarez, M. Pinsky and D. Avnir, *SHAPE*. 2013, **2.3**.
- (10) S. Alvarez, D. Avnir, M. Llunell and M. Pinsky, *New J. Chem.*, 2002, **26**, 996-1009.
